# Supplementary material for: α-Synuclein induced toxicity in brain stem serotonin neurons mediated by an AAV vector driven by the tryptophan hydroxylase promoter
Source: PubMed Central journal article supplement (PMC4876322; doi:10.1038/srep26285), 2016-05-23
Supplement: srep26285-s1.pdf [file srep26285-s1.pdf]

**$\alpha$ -Synuclein induced toxicity in brain stem serotonin neurons mediated by an AAV vector driven by the tryptophan hydroxylase promoter**

Oi Wan Wan, Eunju Shin, Bengt Mattsson, Dorian Caudal, Per Svenningsson, Anders Björklund

***Supplementary Figure 1***

**Representative picture of synapsin1-driven GFP expression in dorsal raphe. (A) tryptophan hydroxylase (TPH) immunostaining (B) GFP immunostaining at 4 weeks after the transduction. Scale bar = 1mm**

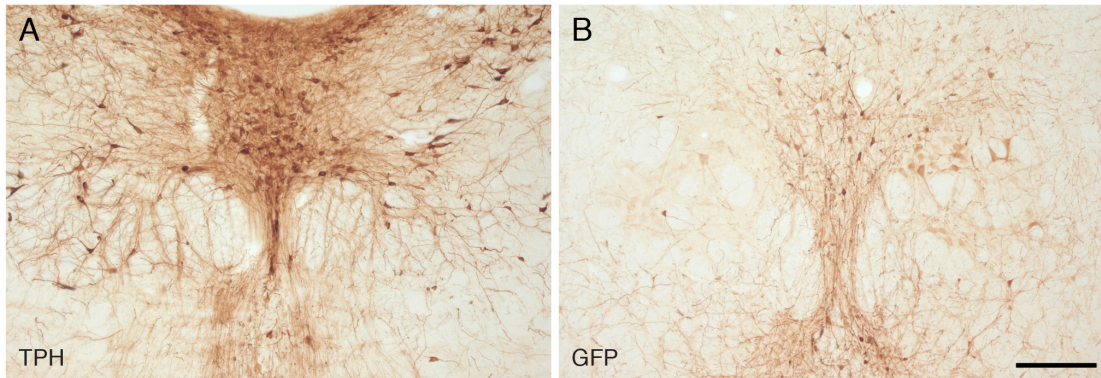

**Supplementary Figure 2**

**Sequence of the TPH promoter used in the production of the AAV-TPH- $\alpha$ -syn and AAV-TPH-GFP vectors (obtained from K. Benzekroufa et al., *Gene Therapy* 16, 681-688, 2009)**

agatctggactgaccactccgtgcctttgctttcgtgtcttctgcagagaggtcgataccctttgttctacttggtatcgaca  
acttgattctctcagccagactgtgatctccgtgggtcagtgtgcatcgaacacttcttgcacgcttgggattcagttcagct  
tactagaaactcagggctcaacaaaatgttgagttatacatctgttctgtgtctggctctgtagctgtcgagctgcttttctt  
acaccttctccttcttggagaacacggattcccaaagtcaattgactgaattaagatcctaccttagacattctttgtg  
ccttagtacacacacacatacacacacacacacacacacacacagatgcacacacatacacacatatgcacacaca  
catacacacagatgcacacacacacatacacacacagatgcacacacgcatacacatacacacagatgcacacaca  
catacacatacacacagatgcacacacgcacacacatacacacacacatgcacacgcacacataaacatacacacaga  
tgcacacacgcacacacataaacatacacatgcacacacacacacatgcacacacacatgcacatgcacacacac  
acacacaccagtttatgataactgactatgttctgacctataaacgtgcataaaaatccagaatatgattacttagcattgtag  
ctattattttaacaattctcagttaatttataataatctcttctcttagcctcttagtcttcagaggaaataggagctaaatga  
ttattccagagttggatcaataataatcctaaacctcaagtctccagaacagttaaaatccaaccaatgtaacatataca  
gactgttttgaagaatcttctttgtttctatacaatccaattgtacgagctccagatttgttttagtcttcagttaaacatgtact  
cttggttaagaatttccatgtttaaagttattttgttttacgtacatgagtagctgtcttcatacacaccagaaga  
gggcatcaaatcccattacatagattgtgagccactagtggttctgggatttgaactcaggacctggaagagcagt  
cagcactcttaaccactaagctatctctccagcccaacttccattctttaaaggattgctaagcttcccgtggctttctaaa  
gttgggaaggtacctatagaatgtctatgctgtcagattgctgggtctgattaagttatagatggggagcagcagaattg  
catcagaaaagcatcaaaggatagtgggcctatgggcatttcattccatagtttcttacttagtgaagaacattctagaag  
gtgagcatctggctaagttcaagcctgaattcaatagcctgagtaaccttctacctggagacaccacaggttttggaaac  
aggcctcttacgaaagccatcacacatacacataaaaattgcacatcgtaacatgtcatgggtgcagaaaagccttctt  
aagctatcttacttttagaaagcacaagcactcaactcatagttactggaagactgagggtaacctccaatagcaggc  
cctagaattaaattagacgactgctatgttgaaggaaaaataataaacctgacgcatagctctccaccatctct  
tcccaaagggtactcgacctatgaaacaaacaatctcatcatgagcacagataacccaggctcagacgtgtaactctga  
ttgtggccatcagcaaccagaaatgagttttctaatcagctcccatcactcctcagtcactcatataaaggaacacagga  
ggggaggaagcgcactgctctcagcaccagggtctggacagcgcctcgagcagccagctgccgctcaccttctccta  
catctctgccgcaccggt
